# Supplementary material for: Monitoring the doping of graphene on SiO2/Si substrates during the thermal annealing process
Source: Royal Society of Chemistry journal article supplement (doi:10.1039/c6ra10764h), 2016-01-01
Supplement: c6ra10764h1.pdf [file c6ra10764h1.pdf]

### Supporting information

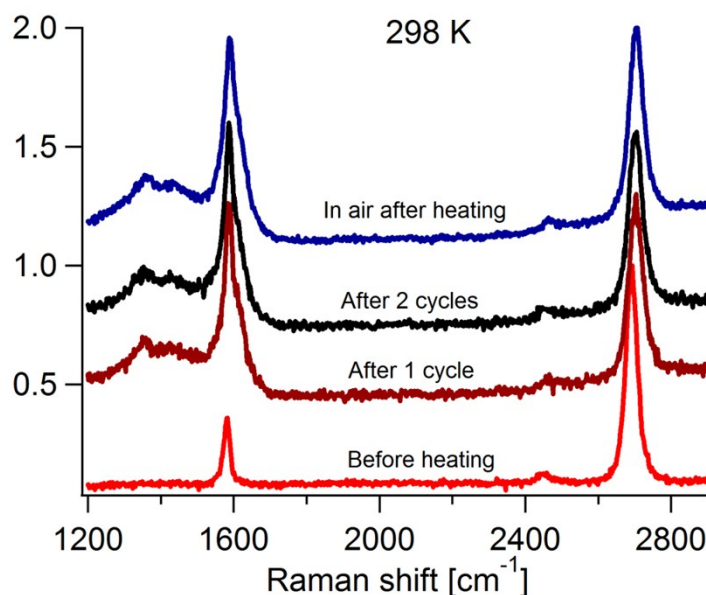

**Figure S1.** Raman spectra, at 2.54 eV, of undoped 1-LG. The spectra were acquired at room temperature at different times during thermal treatment (to 973 K). From the bottom to the top: before heating, after 1 and 2 cycles, and in air after the heating cell was opened. The spectra were normalized to the 2D band intensity and are offset for clarity.

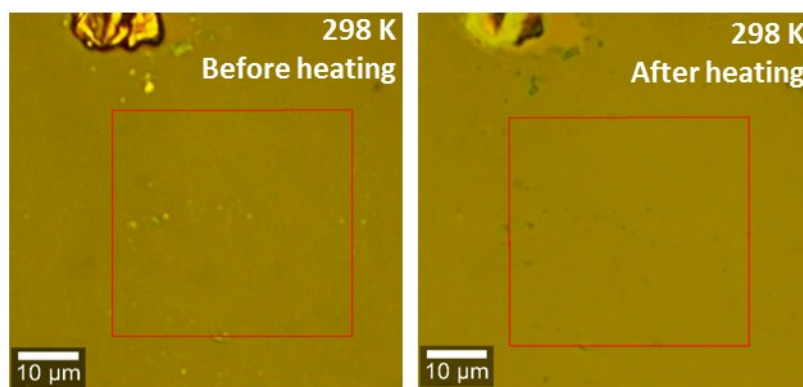

**Figure S2.** Optical images obtained at room temperature, in the same area of the sample, before (left panel) and after (right panel) heating at 973 K.

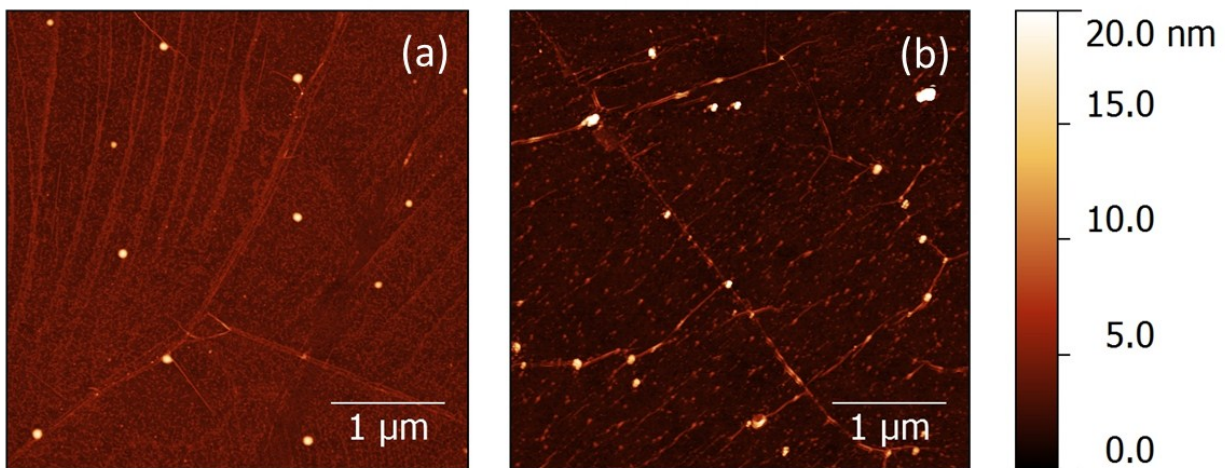

**Figure S3.** AFM images of the sample before (a) and after annealing (b).
